# Supplementary material
Source: ML conference proceedings conference paper supplement (https://www.ecva.net/papers/eccv_2020/papers_ECCV/html/123620290_ECCV_2020_paper.php)
Supplement: Supplementary file 2 [file 123620290-supp.zip]

Archive with 2 entries (2 files):
- 2729-suppledoc.pdf
- 2729-supplevideo.mp4
